# Supplementary material
Source: PubMed Central journal article supplement (PMC6646151)
Supplement: ao8b01613_si_001.pdf [file ao8b01613_si_001.pdf]

Supplementary Information for  
Spatially Localized Synthesis and Structural  
Characterization of Platinum Nanocrystals  
Obtained using UV Light

*Jonathan Quinson,<sup>†,‡,\*</sup> Laura Kacenauskaite,<sup>†,‡</sup> Troels L. Christiansen,<sup>†</sup>*

*Tom Vosch,<sup>†,\*</sup> Matthias Arenz<sup>‡,\*</sup> and Kirsten M. Ø. Jensen<sup>†,\*</sup>*

<sup>†</sup> Nano-Science Center, Department of Chemistry, University of Copenhagen,  
Universitetsparken 5, DK-2100 Copenhagen Ø, Denmark

<sup>‡</sup> Department of Chemistry and Biochemistry, University of Bern, Freiestrasse 3, CH-3012  
Bern, Switzerland

KEYWORDS

platinum, nanoparticles, UV-induced synthesis, polyol process, pair distribution function

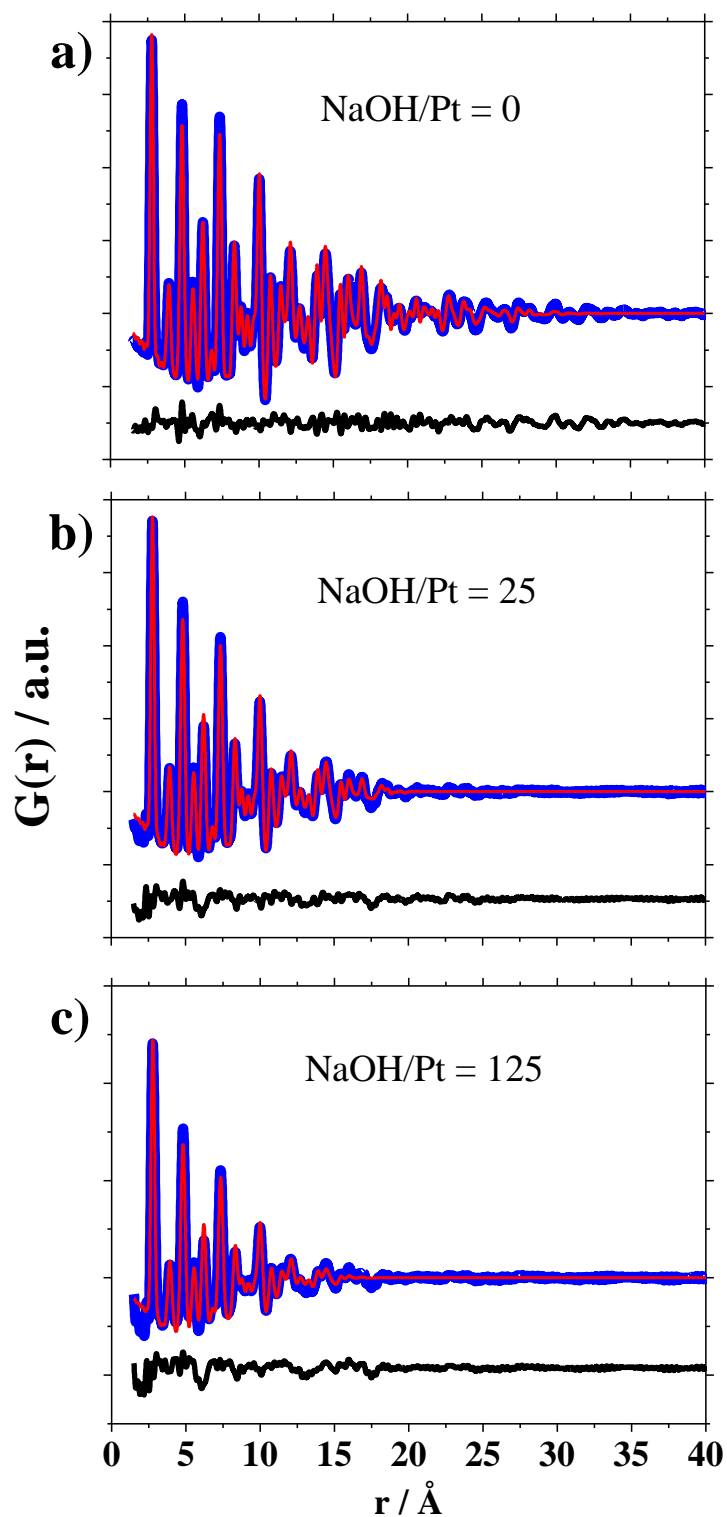

**Figure S1.** Raw data (blue), fit (red) and difference between fit and raw data (black) for Pt nanoparticles obtained with a NaOH/Pt molar ratio of (a) 0, (b) 25 and (c) 125. The PDFs were modelled applying a spherical dampening function.

**Table S1.** Table comparing the size of the nanoparticles obtained for different NaOH/Pt molar ratio by UV-induced synthesis for PDF using a spherical envelope model.

|                               | PDF                |       |       |
|-------------------------------|--------------------|-------|-------|
|                               | Spherical envelope |       |       |
| NaOH/Pt                       | 0                  | 25    | 125   |
| Mean crystallite diameter / Å | 34                 | 22    | 18    |
| Rw / %                        | 12.0               | 13.1  | 19.3  |
| Unit cell / Å                 | 3.932              | 3.931 | 3.927 |
| Biso / Å <sup>-2</sup>        | 0.86               | 0.94  | 1.12  |
| delta2 / Å                    | 3.86               | 3.69  | 3.96  |

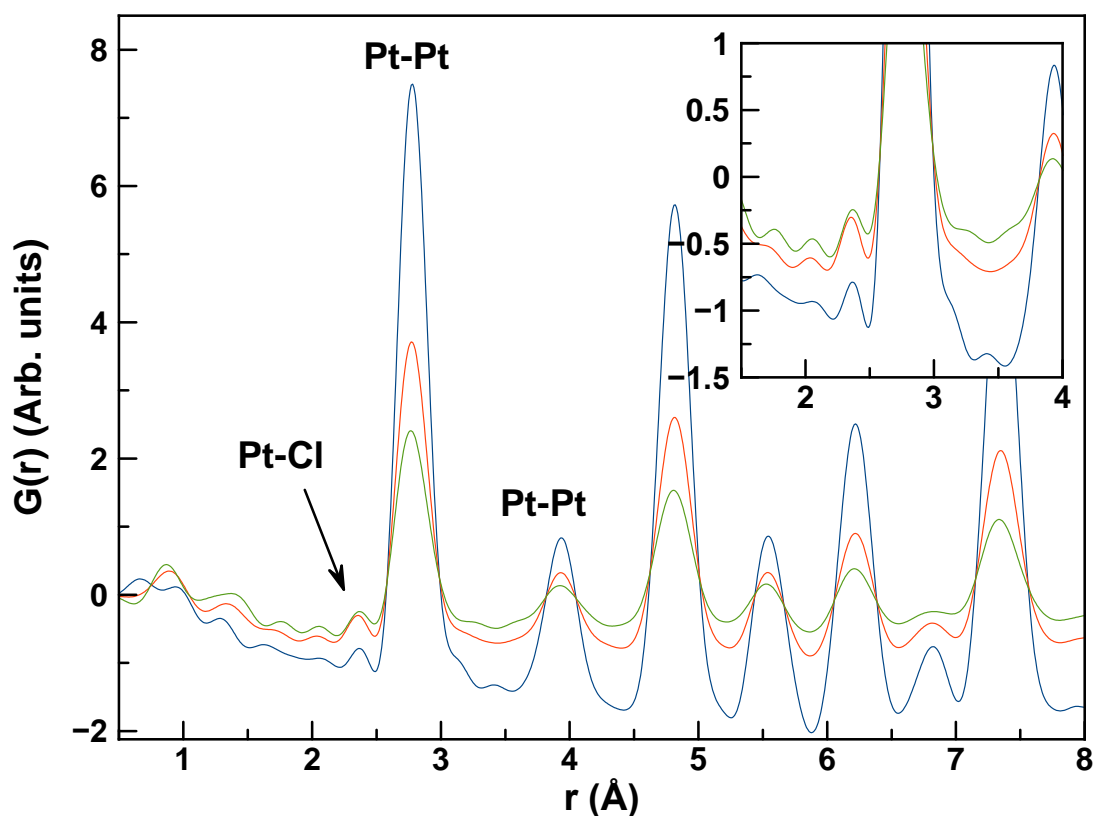

**Figure S2.** PDFs from the 3 samples: The blue line shows data from NaOH/Pt=0, red from NaOH/Pt=25 and green from NaOH/Pt=125. A small PDF peak is seen at 2.4 Å, corresponding to a Pt-Cl distance, either from remaining platinum chloride complexes formed during the synthesis, or from interactions between Cl<sup>-</sup> ions and the particle surface.

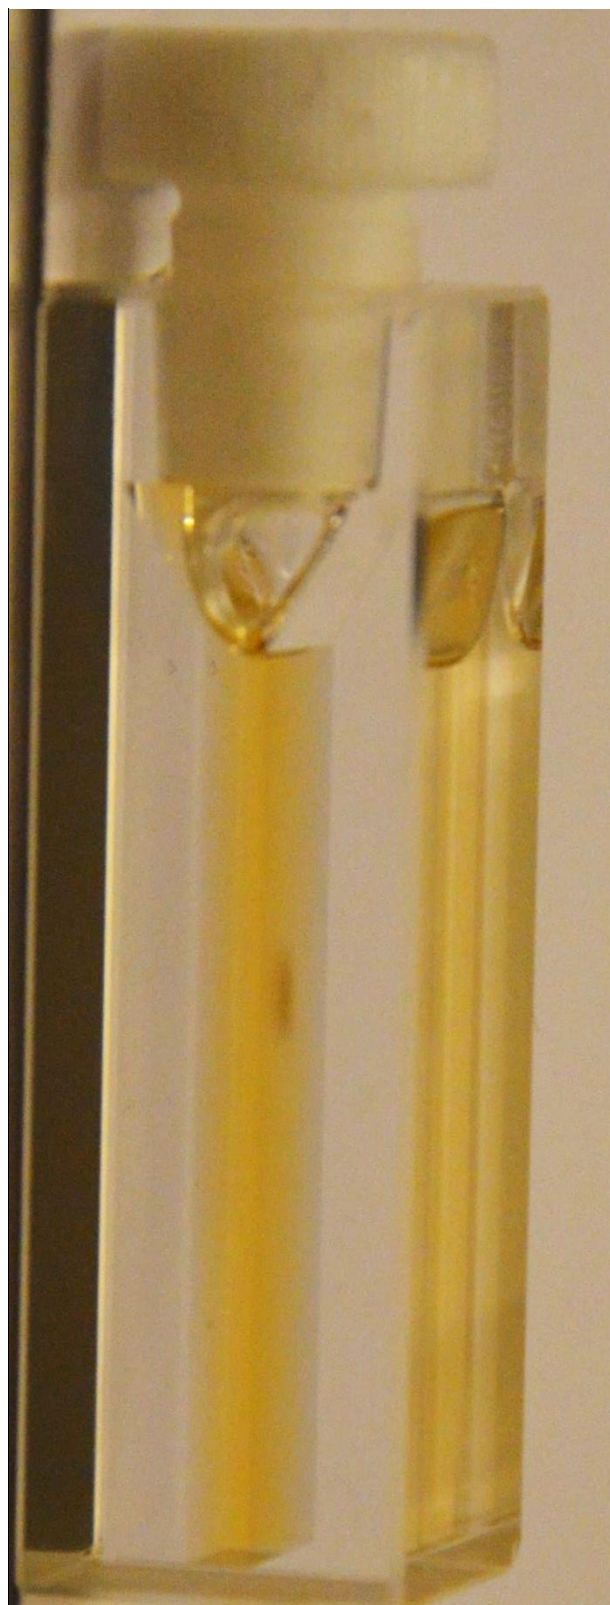

**Figure S3.** Pictures of a solution of  $\text{H}_2\text{PtCl}_6$  in alkaline ethylene glycol in a 1 mm path length quartz cuvette after exposure to a UV laser. The picture is taken at an angle to see the brown spot corresponding to the formation of Pt nanoparticles.
